# Supplementary material for: Photofunctional hybrids of rare earth complexes covalently bonded to ZnO core–shell nanoparticle substrate through polymer linkage
Source: Royal Society of Chemistry journal article supplement (doi:10.1039/c2dt30714f), 2012-01-01
Supplement: c2dt30714f.pdf [file c2dt30714f.pdf]

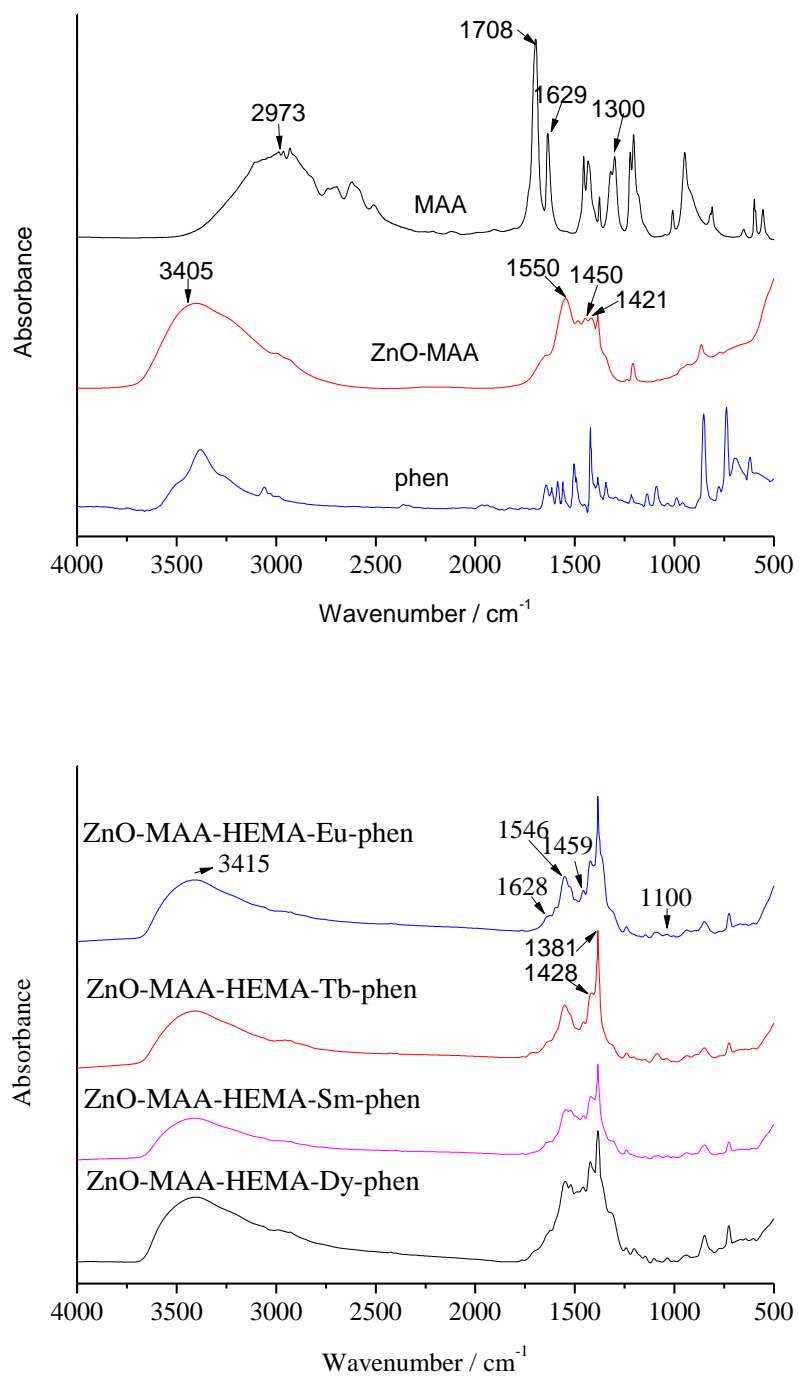

**Figure S1** FTIR spectra of precursors MMA, ZnO-MAA and phen (a) and ZnO-MAA-HEMA-RE-phen (RE = Eu, Tb, Sm, Dy) hybrids (b)

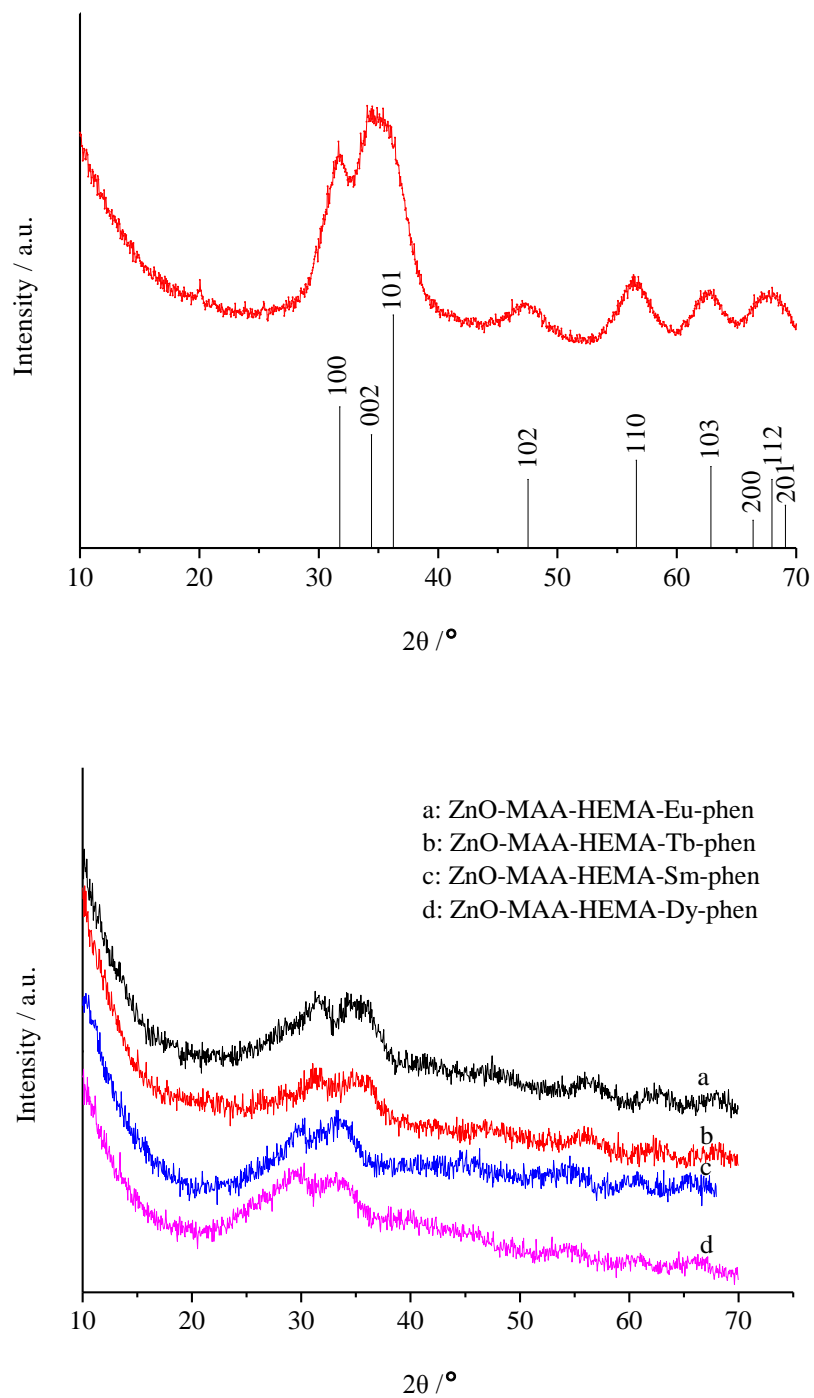

**Figure S2** X-ray diffraction pattern for ZnO-MAA (a) and the hybrids: HEMA-Eu-phen, ZnO-MAA-HEMA-Tb-phen, ZnO-MAA-HEMA-Sm-phen and ZnO-MAA-HEMA-Dy-phen (b)

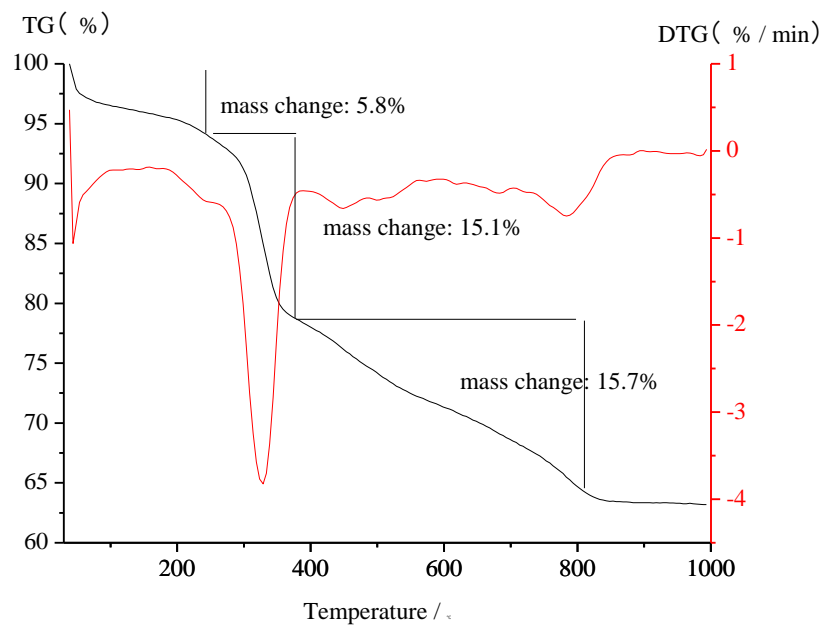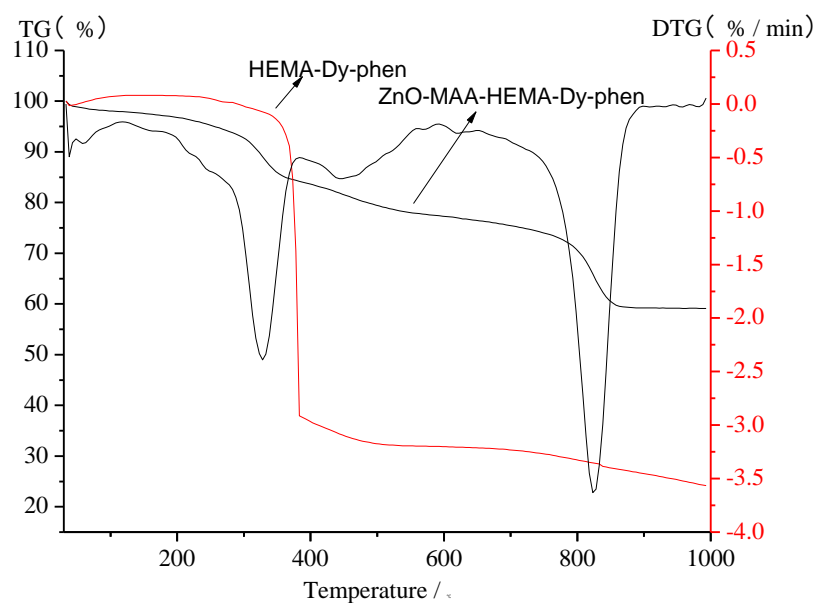

**Figure S3** Selected TG and DTG curves of ZnO-MAA-HFBMA-Tb-phen (a) and ZnO-MAA-HEMA-Dy-phen (b) hybrids

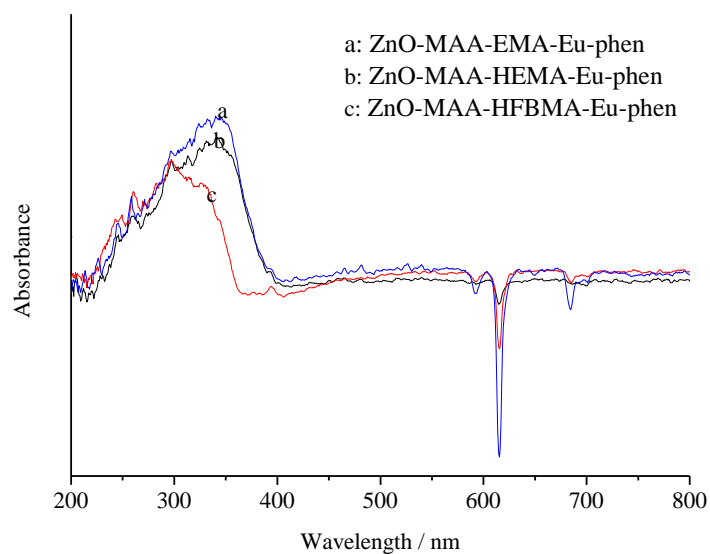

**Figure S4** Ultraviolet-visible diffuse reflection absorption spectra of ZnO-MAA-EMA-Eu-phen, ZnO-MAA-HEMA-Eu-phen and ZnO-MAA-HFBMA-Eu-phen

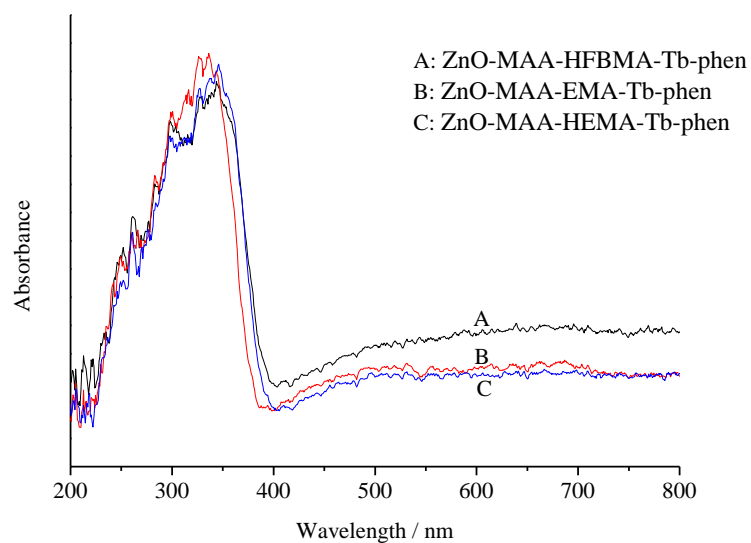

**Figure S5** Ultraviolet-visible diffuse reflection absorption spectra of ZnO-MAA-EMA-Tb-phen, ZnO-MAA-HEMA-Tb-phen and ZnO-MAA-HFBMA-Tb-phen
